# Supplementary material for: Heterojunction with organic thin layer for three dimensional high performance hybrid solar cells
Source: Royal Society of Chemistry journal article supplement (doi:10.1039/c2jm15674a), 2012-01-01
Supplement: c2jm15674a.pdf [file c2jm15674a.pdf]

## Heterojunction with Organic Thin Layer for Three Dimensional High Performance Hybrid Solar cells

Fute Zhang<sup>a</sup>, Xiaoyuan Han<sup>a</sup>, Shuit-tong Lee<sup>b</sup>, Baoquan Sun<sup>\*a</sup>

<sup>5</sup> Received (in XXX, XXX) Xth XXXXXXXXX 20XX, Accepted Xth XXXXXXXXX 20XX

DOI: 10.1039/b000000x

<sup>a</sup> Jiangsu Key Laboratory for Carbon-Based Functional Materials & Devices, Institute of Functional Nano & Soft Materials (FUNSOM), Soochow University, 199 Ren'ai Road, Suzhou, China. Fax: 86-512-65880846; Tel: 0512-65889951; E-mail: bqsun@suda.edu.cn

<sup>b</sup> Center of Super-Diamond and Advanced Films (COSDAF) and Department of Physics and Materials Science, City University of Hong Kong, Hong Kong SAR, Country. Fax: 852-2784-4696; E-mail: apannale@cityu.edu.hk

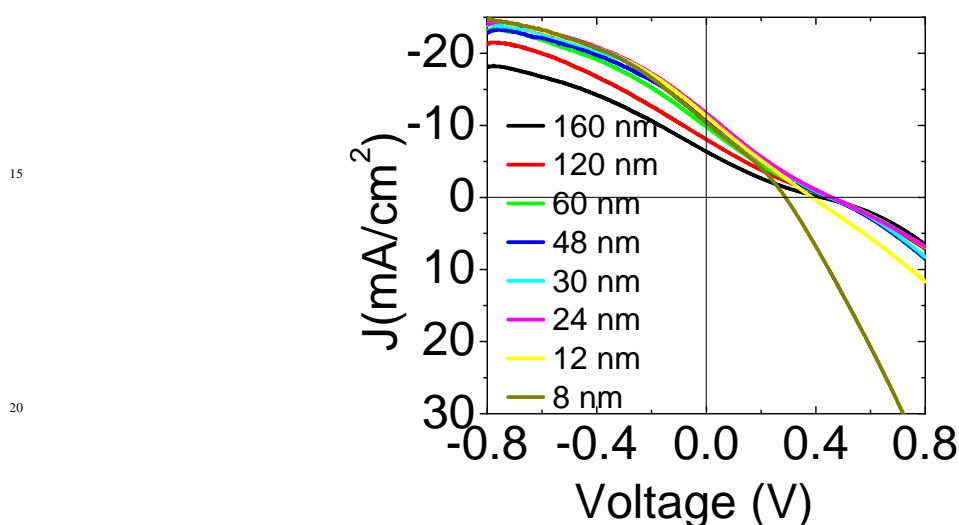

Fig. S1 J-V curves of solely planar junction devices based on polished silicon substrates with different thicknesses of P3HT films.

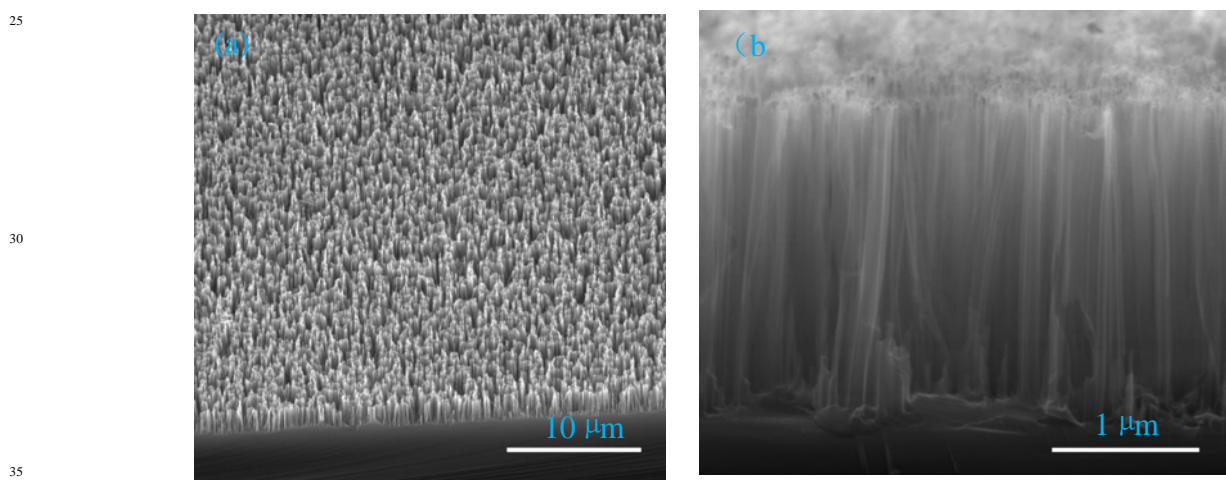

Fig. S2 Scanning electron microscopy (SEM) images of freshly prepared silicon nanopillar arrays (SiNPs) with view angle of (a) 45° and (b) 90°.

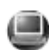

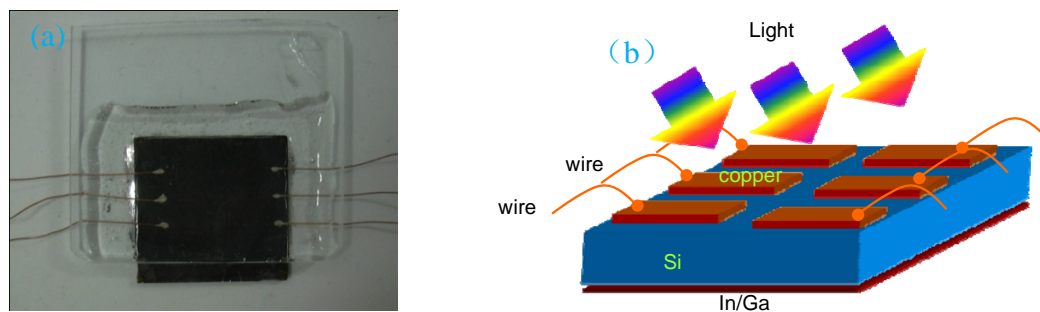

**Fig. S3** (a) Real SiNPs device encapsulate with glass and epoxy resin. As shown in (b) (not in real scale), there is six pixels on the top surface. Due to strong light trap capability of SiNPs, the ultrathin copper electrodes (1.5 mm×5 mm) were difficult to be observed in images. The copper wires are adhered on electrodes by silver paste.

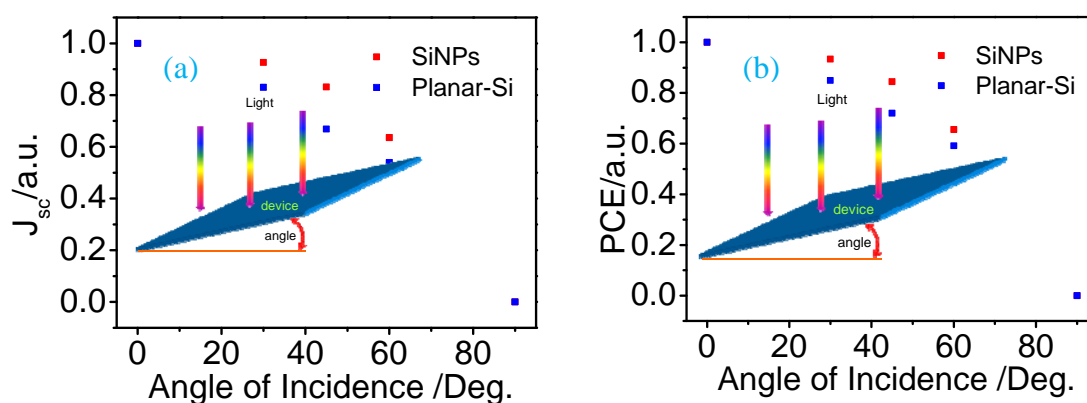

**Fig. S4**(a) Measured short circuit current density ( $J_{sc}$ , normalized) and (b) power conversion efficiency (PCE, normalized) of hybrid devices with SiNPs and planar silicon as top layer over different angles of incidence under AM 1.5 G illumination at  $100 \text{ mWcm}^{-2}$ .

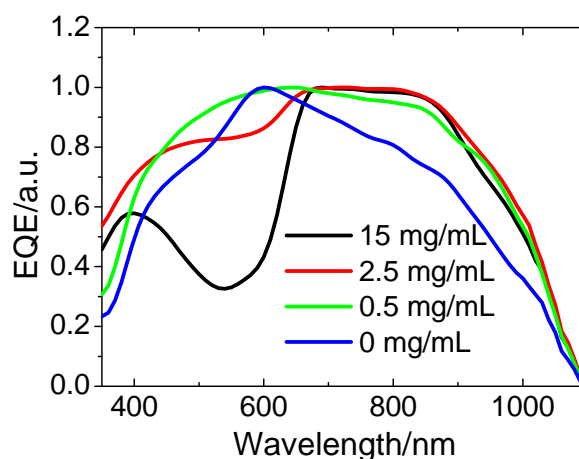

**Fig. S5** Normalized short-circuit external quantum efficiency (EQE) of devices made by spin coating 15 mg/mL, 2.5 mg/mL, 0.5 mg/ml P3HT on SiNPs. 0 mg/mL means direct metal contact without P3HT layer.

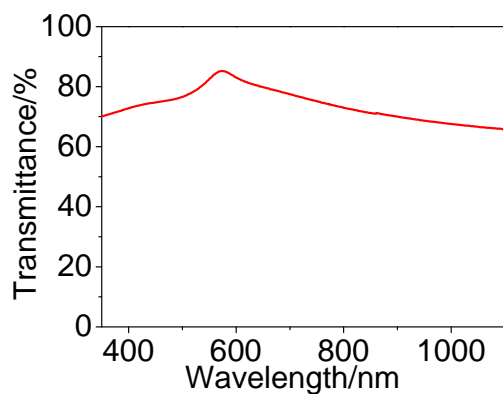

**Fig. S6** Transmittance spectra of ~10 nm Cu film on glass.

**Table S1** Electric output characteristics of hybrid devices based on planar silicon substrates with different thicknesses of P3HT.

| Device | Thickness of P3HT (nm) | $J_{sc}$ ( $\text{mAcm}^{-2}$ ) | $V_{oc}$ (V) | FF   | PCE (%) |
|--------|------------------------|---------------------------------|--------------|------|---------|
| 1      | 160                    | 6.4                             | 0.422        | 0.20 | 0.5     |
| 2      | 120                    | 8.1                             | 0.453        | 0.21 | 0.7     |
| 3      | 60                     | 9.8                             | 0.447        | 0.21 | 0.9     |
| 4      | 48                     | 11.0                            | 0.447        | 0.21 | 1.0     |
| 5      | 30                     | 11.6                            | 0.452        | 0.21 | 1.1     |
| 6      | 24                     | 11.6                            | 0.459        | 0.21 | 1.1     |
| 7      | 12                     | 11.3                            | 0.386        | 0.24 | 1.0     |
| 8      | 8                      | 10.4                            | 0.289        | 0.29 | 0.9     |
